# Supplementary figures and images for: A genome‐wide association study identifies eight loci associated with intraductal papillary mucinous neoplasm progression toward malignancy
Source: PubMed Central journal article supplement — Cancer. 2024 Dec 5;131(1):e35678. doi: 10.1002/cncr.35678 (PMC11694541; doi:10.1002/cncr.35678), 2024-12-05

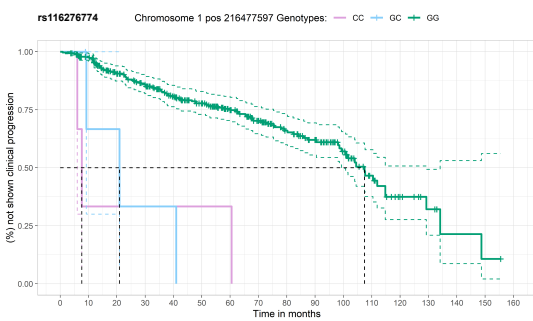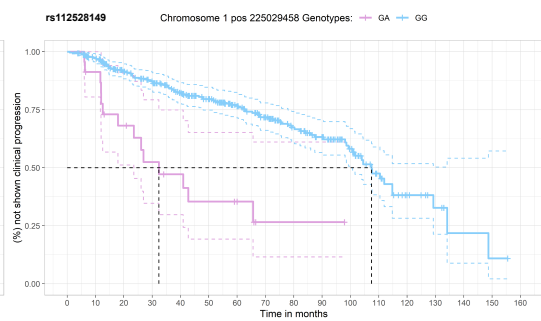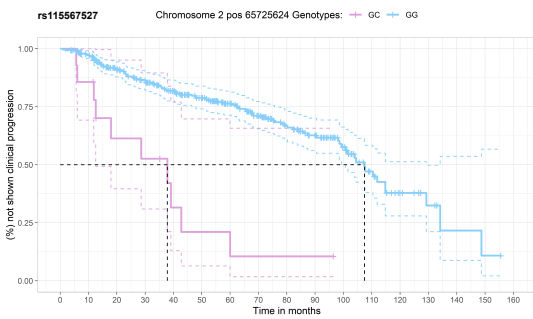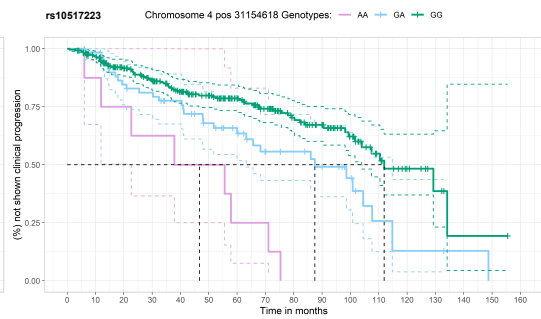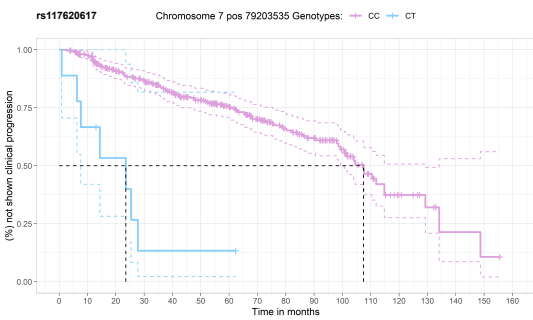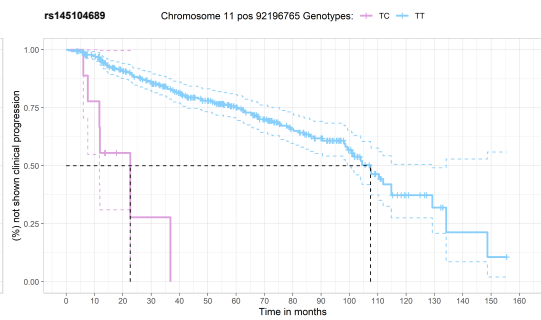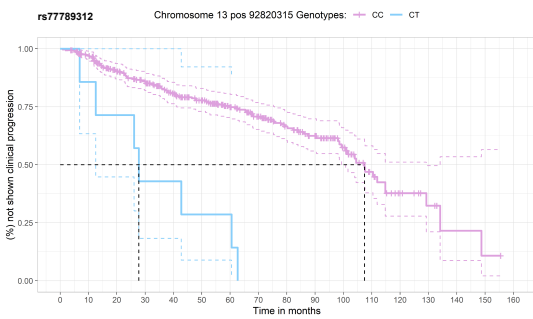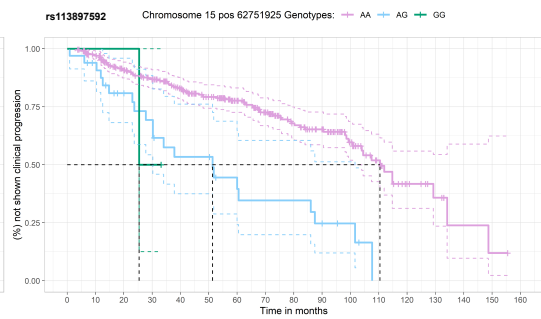

Supplement: CNCR-131-0-s002.pdf [file CNCR-131-0-s002.pdf]
